# Supplementary material
Source: HighWire-hosted journal article supplement (https://ijgc.bmj.com/content/33/10/1548)
Supplement: inline-supplementary-material-3 [file inline-supplementary-material-3.pdf]

1 **Table S2 - EORTC QLQ-Cx24 questionnaire scores over time according to**  
 2 **lymphadenectomy group**

3

| Scale/Item             |         | N   | Mean  | SD     | P value |
|------------------------|---------|-----|-------|--------|---------|
| Symptom scales         | SLN     | 112 | 13.85 | ±14.53 | 0.687   |
|                        | SLN+LND | 39  | 14.93 | ±14.10 |         |
| Symptom scales 1m      | SLN     | 108 | 11.95 | ±12.41 | 0.012   |
|                        | SLN+LND | 39  | 18.13 | ±14.57 |         |
| Symptom scales 6m      | SLN     | 100 | 11.69 | ±15.15 | 0.083   |
|                        | SLN+LND | 34  | 17.04 | ±16.12 |         |
| Symptom scales 12m     | SLN     | 100 | 8.76  | ±9.88  | 0.124   |
|                        | SLN+LND | 34  | 11.91 | ±11.18 |         |
| Symptom Experience     | SLN     | 111 | 12.53 | ±11.41 | 0.996   |
|                        | SLN+LND | 39  | 12.53 | ±11.44 |         |
| Symptom Experience 1m  | SLN     | 108 | 7.14  | ±8.10  | 0.096   |
|                        | SLN+LND | 38  | 9.96  | ±10.96 |         |
| Symptom Experience 6m  | SLN     | 100 | 5.61  | ±8.54  | 0.047   |
|                        | SLN+LND | 34  | 9.38  | ±11.85 |         |
| Symptom Experience 12m | SLN     | 99  | 5.81  | ±8.42  | 0.174   |
|                        | SLN+LND | 34  | 8.30  | ±11.08 |         |
| Body Image             | SLN     | 111 | 11.86 | ±21.33 | 0.137   |
|                        | SLN+LND | 39  | 6.55  | ±10.10 |         |
| Body Image 1m          | SLN     | 108 | 10.08 | ±16.31 | 0.966   |
|                        | SLN+LND | 38  | 9.94  | ±21.26 |         |
| Body Image 6m          | SLN     | 100 | 9.33  | ±18.66 | 0.123   |
|                        | SLN+LND | 34  | 16.01 | ±28.84 |         |
| Body Image 12m         | SLN     | 99  | 8.19  | ±16.69 | 0.098   |
|                        | SLN+LND | 34  | 13.72 | ±16.81 |         |
| Lymphoedema            | SLN     | 110 | 13.93 | ±24.05 | 0.389   |
|                        | SLN+LND | 39  | 10.25 | ±18.97 |         |
| Lymphoedema 1m         | SLN     | 107 | 7.16  | ±15.20 | 0.989   |
|                        | SLN+LND | 37  | 7.20  | ±19.46 |         |
| Lymphoedema 6m         | SLN     | 100 | 12.33 | ±23.04 | 0.291   |
|                        | SLN+LND | 34  | 17.64 | ±30.96 |         |
| Lymphoedema 12m        | SLN     | 99  | 12.45 | ±23.12 | 0.022   |
|                        | SLN+LND | 34  | 23.52 | ±26.62 |         |
| Peripheral Neuropathy  | SLN     | 109 | 9.48  | ±23.17 | 0.154   |
|                        | SLN+LND | 39  | 16.23 | ±30.46 |         |

|                           |         |     |       |        |       |
|---------------------------|---------|-----|-------|--------|-------|
| Peripheral Neuropathy 1m  | SLN     | 106 | 5.34  | ±13.90 | 0.190 |
|                           | SLN+LND | 38  | 11.40 | ±26.02 |       |
| Peripheral Neuropathy 6m  | SLN     | 99  | 14.81 | ±26.60 | 0.004 |
|                           | SLN+LND | 34  | 36.27 | ±37.93 |       |
| Peripheral Neuropathy 12m | SLN     | 97  | 13.74 | ±24.88 | 0.009 |
|                           | SLN+LND | 33  | 28.28 | ±33.45 |       |
| Menopausal Symptoms       | SLN     | 110 | 25.75 | ±36.86 | 0.355 |
|                           | SLN+LND | 39  | 19.65 | ±30.31 |       |
| Menopausal Symptoms 1m    | SLN     | 107 | 22.74 | ±33.83 | 0.113 |
|                           | SLN+LND | 38  | 13.15 | ±25.15 |       |
| Menopausal Symptoms 6m    | SLN     | 98  | 29.59 | ±33.12 | 0.063 |
|                           | SLN+LND | 34  | 17.64 | ±28.70 |       |
| Menopausal Symptoms 12m   | SLN     | 98  | 25.51 | ±32.03 | 0.074 |
|                           | SLN+LND | 34  | 14.70 | ±23.48 |       |
| Functional items          | SLN     | 109 | 4.28  | ±14.59 | 0.540 |
|                           | SLN+LND | 39  | 5.98  | ±15.52 |       |
| Functional items 1m       | SLN     | 102 | 2.28  | ±9.68  | 0.019 |
|                           | SLN+LND | 35  | 0.00  | ±0.00  |       |
| Functional items 6m       | SLN     | 95  | 6.14  | ±15.95 | 0.652 |
|                           | SLN+LND | 33  | 7.57  | ±15.07 |       |
| Functional items 12m      | SLN     | 96  | 13.36 | ±21.16 | 0.790 |
|                           | SLN+LND | 34  | 12.25 | ±20.22 |       |
| Sexual Vaginal baseline   | SLN     | 17  | 12.25 | ±18.42 | 0.852 |
|                           | SLN+LND | 7   | 10.71 | ±14.20 |       |
| Sexual Vaginal 1m         | SLN     | 11  | 6.06  | ±10.60 | 0.513 |
|                           | SLN+LND | 2   | 0.00  | ±0.00  |       |
| Sexual Vaginal 6m         | SLN     | 18  | 31.01 | ±29.40 | 0.125 |
|                           | SLN+LND | 7   | 9.52  | ±12.19 |       |
| Sexual Vaginal 12m        | SLN     | 32  | 22.13 | ±23.72 | 0.555 |
|                           | SLN+LND | 11  | 16.66 | ±19.36 |       |
| Sexual Worry              | SLN     | 110 | 15.15 | ±28.78 | 0.290 |
|                           | SLN+LND | 39  | 10.25 | ±25.53 |       |
| Sexual Worry 1m           | SLN     | 103 | 9.70  | ±21.20 | 0.243 |
|                           | SLN+LND | 34  | 5.88  | ±17.35 |       |
| Sexual Worry 6m           | SLN     | 99  | 12.79 | ±27.64 | 0.633 |
|                           | SLN+LND | 34  | 14.70 | ±28.65 |       |
| Sexual Worry 12m          | SLN     | 100 | 11.33 | ±24.26 | 0.590 |
|                           | SLN+LND | 34  | 14.70 | ±27.45 |       |

|                      |         |     |       |        |       |
|----------------------|---------|-----|-------|--------|-------|
| Sexual Activity      | SLN     | 109 | 4.28  | ±14.41 | 0.402 |
|                      | SLN+LND | 39  | 5.12  | ±12.18 |       |
| Sexual Activity 1m   | SLN     | 101 | 1.65  | ±7.26  | 0.181 |
|                      | SLN+LND | 35  | 0.00  | ±0.00  |       |
| Sexual Activity 6m   | SLN     | 95  | 6.66  | ±16.55 | 0.610 |
|                      | SLN+LND | 33  | 9.09  | ±20.87 |       |
| Sexual Activity 12m  | SLN     | 96  | 13.54 | ±21.40 | 0.365 |
|                      | SLN+LND | 34  | 8.82  | ±14.92 |       |
| Sexual Enjoyment     | SLN     | 15  | 31.11 | ±32.03 | 0.680 |
|                      | SLN+LND | 7   | 38.09 | ±35.63 |       |
| Sexual Enjoyment 1m  | SLN     | 10  | 30.00 | ±29.18 | 0.545 |
|                      | SLN+LND | 1   | 0.00  | ±0.00  |       |
| Sexual Enjoyment 6m  | SLN     | 17  | 27.45 | ±26.96 | 0.865 |
|                      | SLN+LND | 6   | 27.77 | ±13.60 |       |
| Sexual Enjoyment 12m | SLN     | 32  | 38.54 | ±25.55 | 0.401 |
|                      | SLN+LND | 11  | 48.48 | ±27.33 |       |

4

5 SLN: sentinel lymph node biopsy; LND: lymphadenectomy.

6
